# Supplementary material for: Local administration of IL-12 with an HC vector results in local and metastatic tumor control in pediatric osteosarcoma
Source: PubMed Central journal article supplement — Mol Ther Oncolytics. 2020 Nov 20;20:23–33. doi: 10.1016/j.omto.2020.11.003 (PMC7851487; doi:10.1016/j.omto.2020.11.003), 2020-11-20
Supplement: mmc1.pdf [file mmc1.pdf]

## **Supplemental Information**

### **Local administration of IL-12 with an HC vector results in local and metastatic tumor control in pediatric osteosarcoma**

**Marta Zalacain, María Bunuales, Lucía Marrodan, Sara Labiano, Marisol Gonzalez-Huarriz, Naiara Martinez-Vélez, Virginia Laspidea, Montse Puigdelloses, Marc García-Moure, Manuela Gonzalez-Aparicio, Rubén Hernandez-Alcoceba, Marta M. Alonso, and Ana Patiño-García**

Supplementary Text

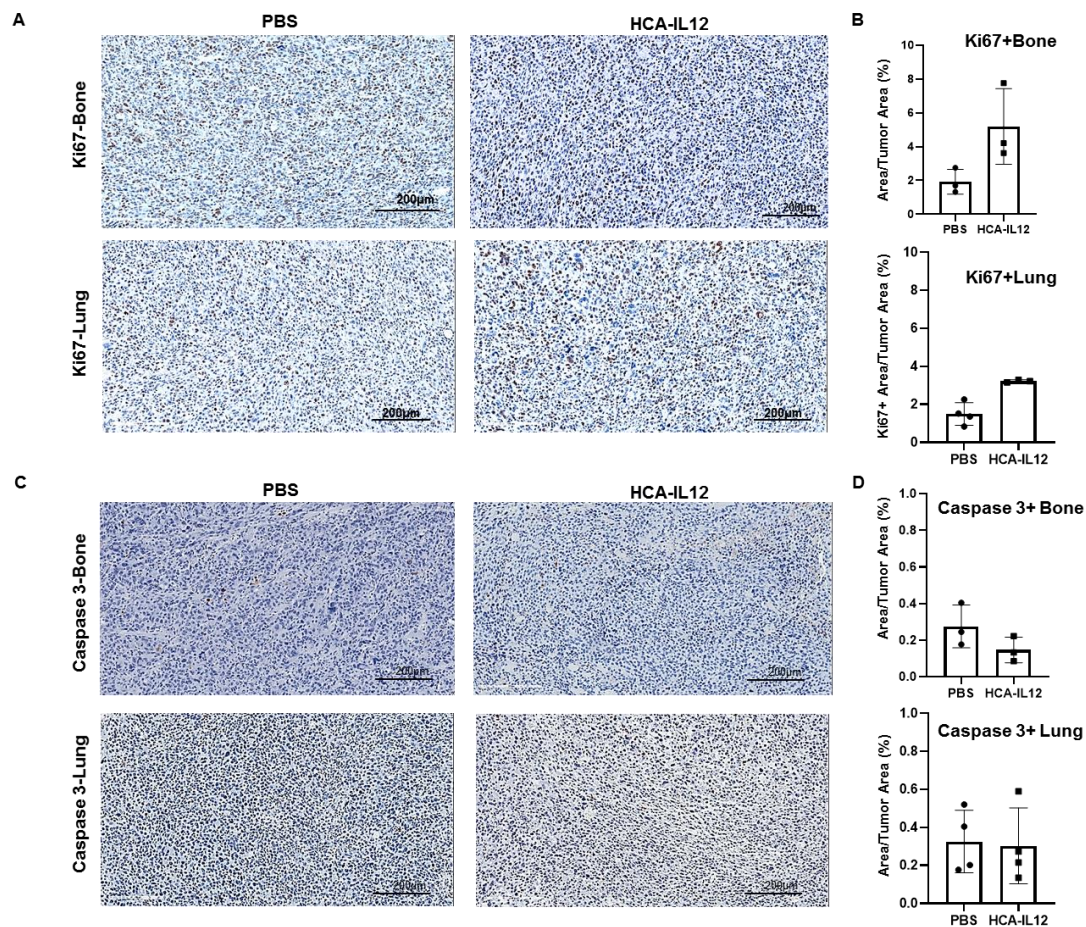

**Supplementary Figure 1.** (A) Representative images of Ki67 immunostaining of osteosarcoma bone tumors (upper panel) and lung metastasis (lower panel) from control (PBS) mice and HCA-EFZP-IL12-treated mice (scale bar, 200  $\mu$ m). (B) Quantification of Ki67 staining in tibia and lung tumors. Graph showing the quantification of cell infiltration represented as the stained area/total tissue area ratio (%) of bone tumors in PBS-treated mice or HCA-EFZP-IL12-treated mice (N = 3-4 mice from each group). Mann Whitney test was used to calculate the significance. (C) Representative images of caspase 3 immunostaining of osteosarcoma bone tumors (upper panel) and lung metastasis (lower panel) from control (PBS) mice and HCA-EFZP-IL12-treated mice (scale bar, 200  $\mu$ m). (D) Quantification of caspase 3 staining in tibia and lung tumors. Graph showing the quantification of cell infiltration represented as the stained area/total

tissue area ratio (%) of bone tumors in PBS-treated mice or HCA-EFZP-IL12-treated mice (N = 3-4 mice from each group). Mann Whitney test was used to calculate the significance.

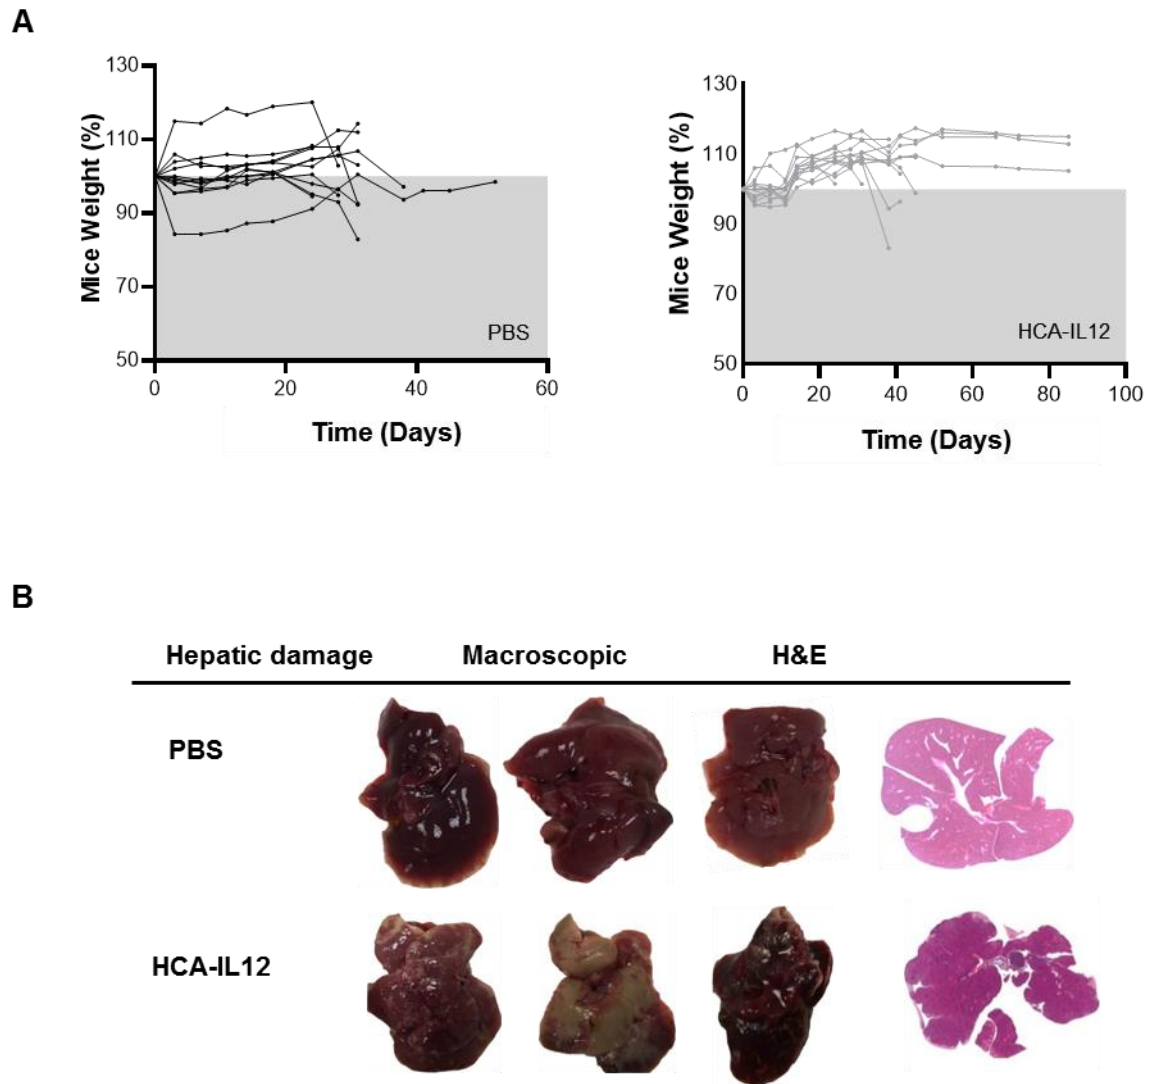

**Supplementary Figure 2 (A)** Evolution of mouse weights after Delta-24-RGD treatment. Each line represents a single mouse and comparison between PBS (black) and HCA-IL12 (grey) was performed by a matched two-way ANOVA ( $P < 0.001$ ). The grey area represents the values under the reference weight. **(B)** Representative macroscopic and histopathological images of livers from the control group (PBS) or treated animals (HCA-IL12).

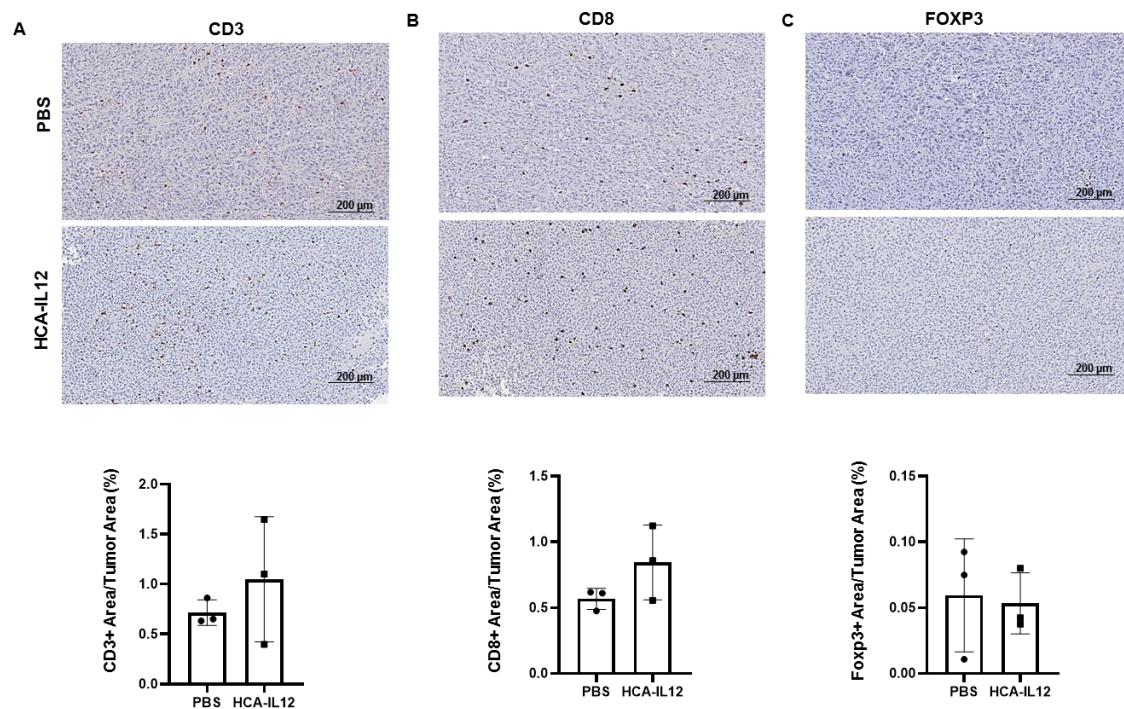

**Supplementary Figure 3.** (A) Representative images of CD3 immunostaining of osteosarcoma bone tumors from control (PBS) mice and HCA-EFZP-IL12-treated mice (upper panel; scale bar, 200  $\mu$ m). Quantification of CD3 staining in tibia (lower panel). Graph showing the quantification of cell infiltration represented as the stained area/total tissue area ratio (%) of bone tumors in PBS-treated mice or HCA-EFZP-IL12-treated mice (N = 3 mice from each group). Mann Whitney test was used to calculate the significance. (B) Representative images of CD8 immunostaining of osteosarcoma bone tumors from control (PBS) mice and HCA-EFZP-IL12-treated mice (upper panel; scale bar, 200  $\mu$ m). Quantification of CD8 staining in tibia (lower panel). Graph showing the quantification of cell infiltration represented as the stained area/total tissue area ratio (%) of bone tumors in PBS-treated mice or HCA-EFZP-IL12-treated mice (N = 3 mice from each group). Mann Whitney test was used to calculate the significance. (C) Representative images of FOXP3 immunostaining of osteosarcoma bone tumors from

control (PBS) mice and HCA-EFZP-IL12-treated mice (upper panel; scale bar, 200  $\mu$ m). Quantification of FOXP3 staining in tibia (lower panel). Graph showing the quantification of cell infiltration represented as the stained area/total tissue area ratio (%) of bone tumors in PBS-treated mice or HCA-EFZP-IL12-treated mice (N = 3 mice from each group). Mann Whitney test was used to calculate the significance.

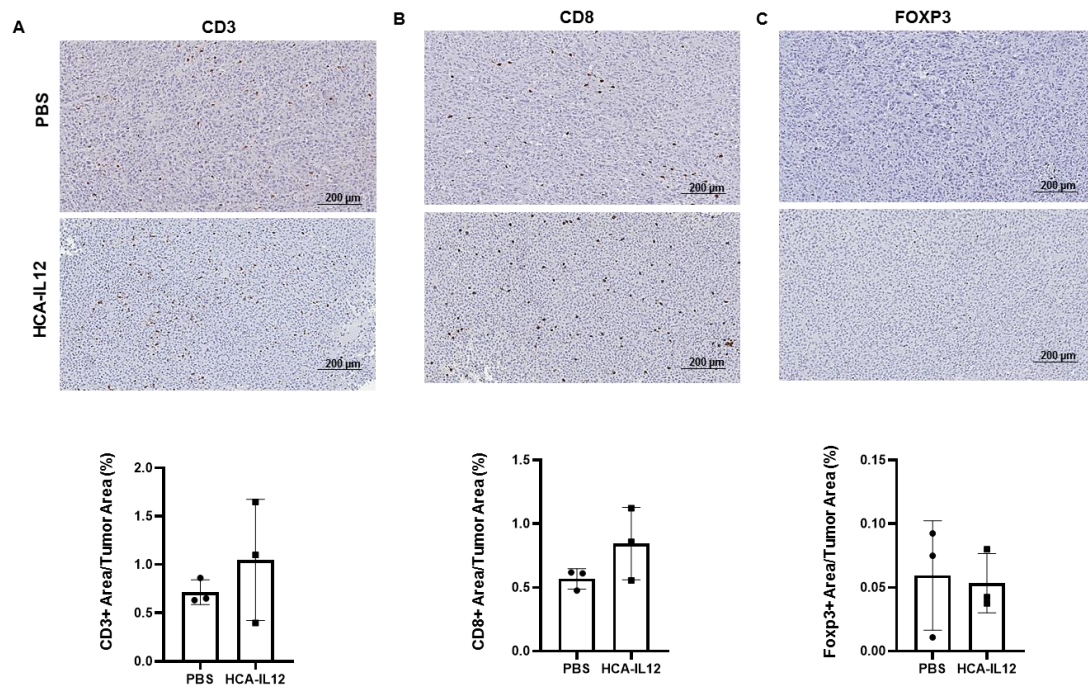

**Supplementary Figure 4.** (A) Representative images of CD3 immunostaining of osteosarcoma lung metastases (PBS) mice and HCA-EFZP-IL12-treated mice (upper panel; scale bar, 200  $\mu$ m). Quantification of CD3 staining in osteosarcoma lung metastases (lower panel). Graph showing the quantification of cell infiltration represented as the stained area/total tissue area ratio (%) of lung metastases in PBS-treated mice or HCA-EFZP-IL12-treated mice (N = 3 mice from each group). Mann Whitney test was used to calculate the significance. (B) Representative images of CD8 immunostaining of osteosarcoma lung metastases from control (PBS) mice and HCA-EFZP-IL12-treated mice (upper panel; scale bar, 200  $\mu$ m). Quantification of CD8 staining in osteosarcoma lung metastases (lower panel). Graph showing the quantification of cell infiltration

represented as the stained area/total tissue area ratio (%) of osteosarcoma lung metastases in PBS-treated mice or HCA-EFZP-IL12-treated mice (N = 3 mice from each group). Mann Whitney test was used to calculate the significance. (C) Representative images of FOXP3 immunostaining of osteosarcoma lung metastases from control (PBS) mice and HCA-EFZP-IL12-treated mice (upper panel; scale bar, 200  $\mu$ m). Quantification of FOXP3 staining in osteosarcoma lung metastases (lower panel). Graph showing the quantification of cell infiltration represented as the stained area/total tissue area ratio (%) of osteosarcoma lung metastases in PBS-treated mice or HCA-EFZP-IL12-treated mice (N = 3 mice from each group). Mann Whitney test was used to calculate the significance.
